# Supplementary material
Source: PubMed Central journal article supplement (PMC6645690)

Fig. S1

**a**

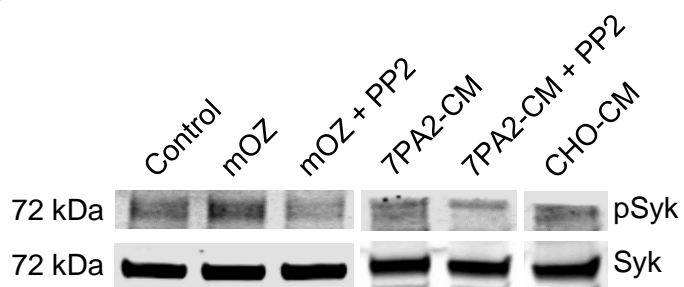

**b**

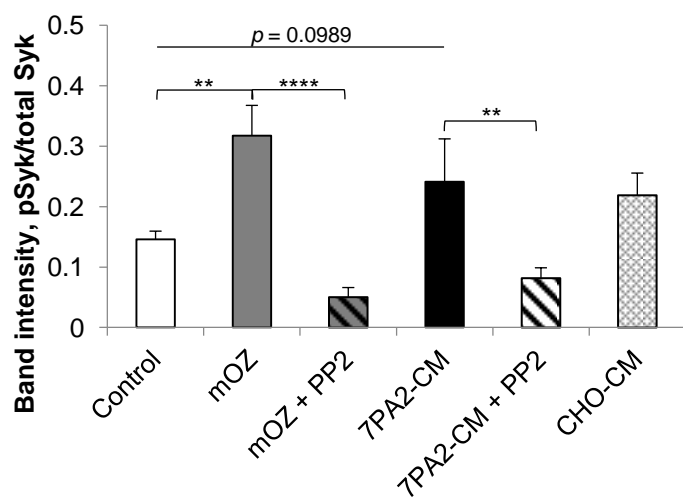

Fig. S2

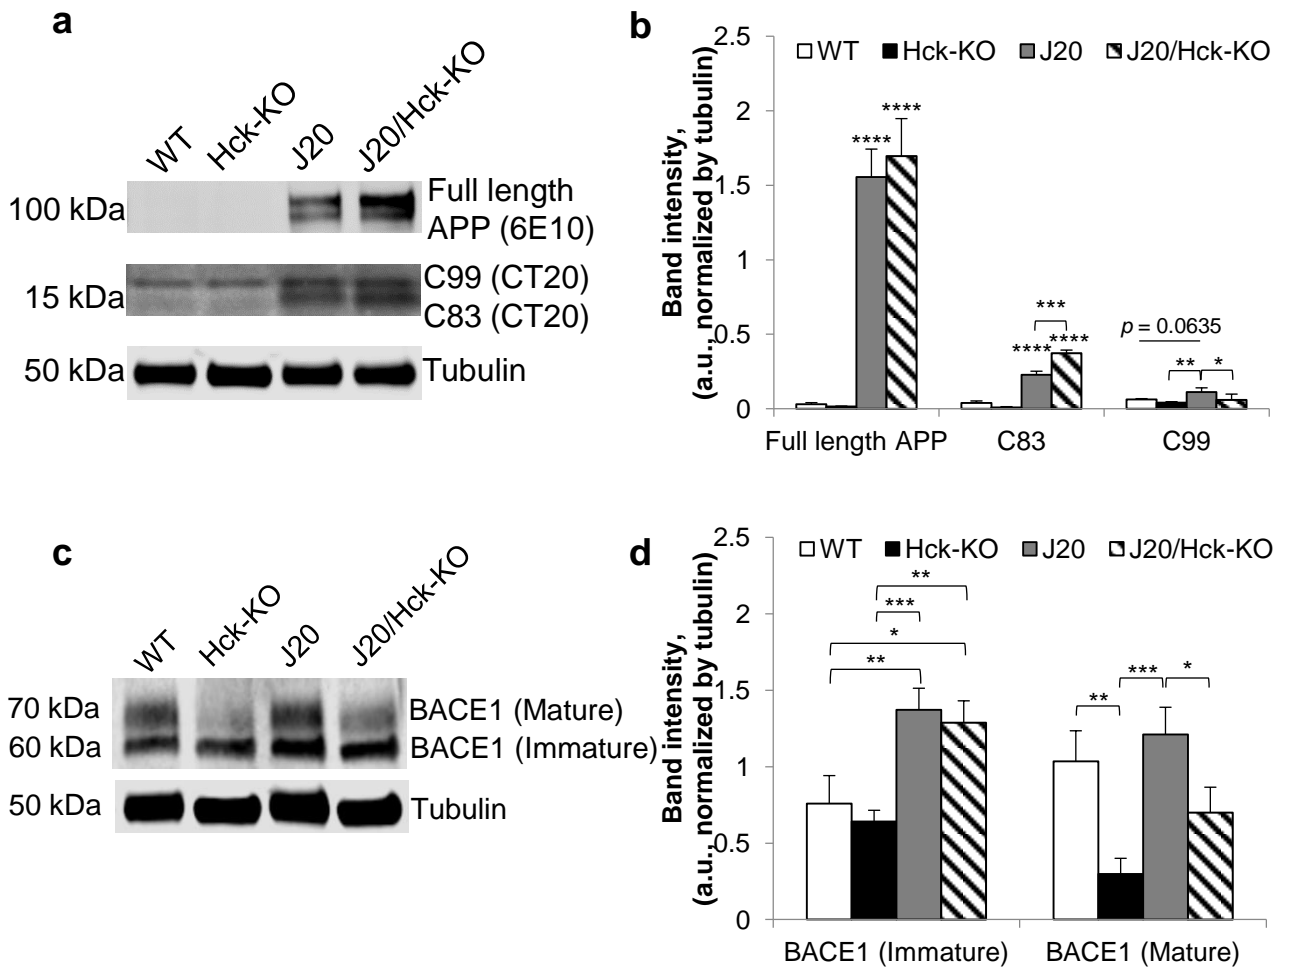

Fig. S3

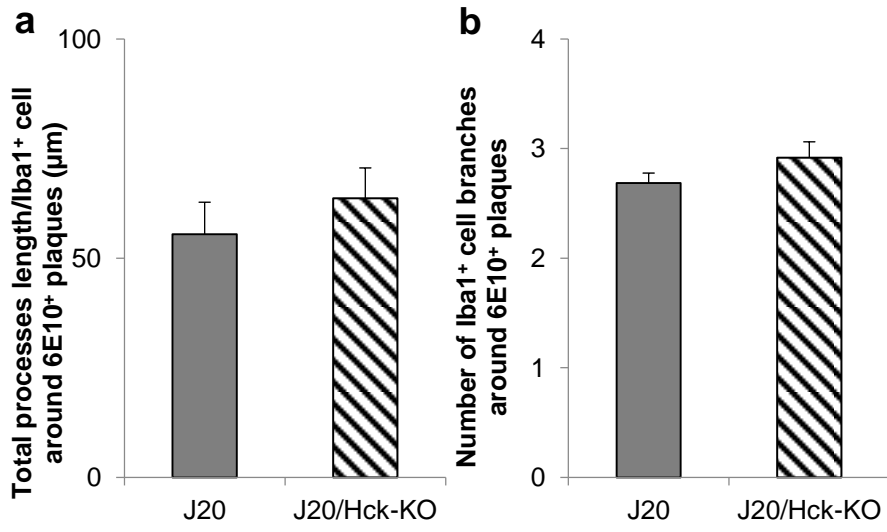

Fig. S4

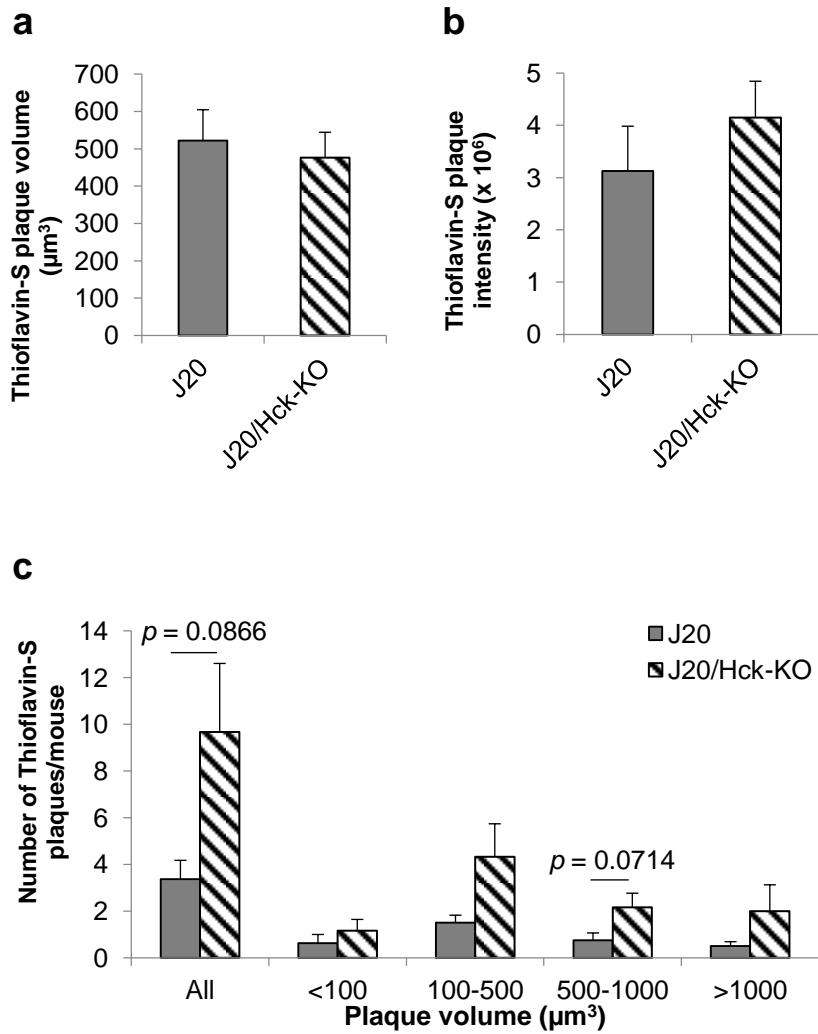

**Fig. S5**

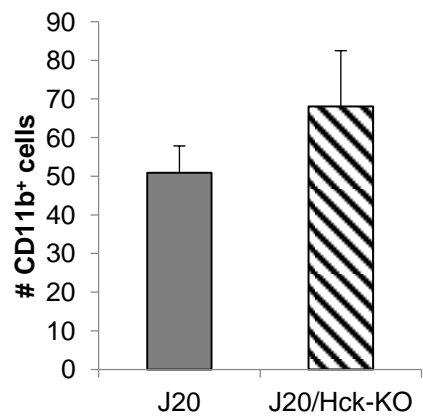

Fig. S6

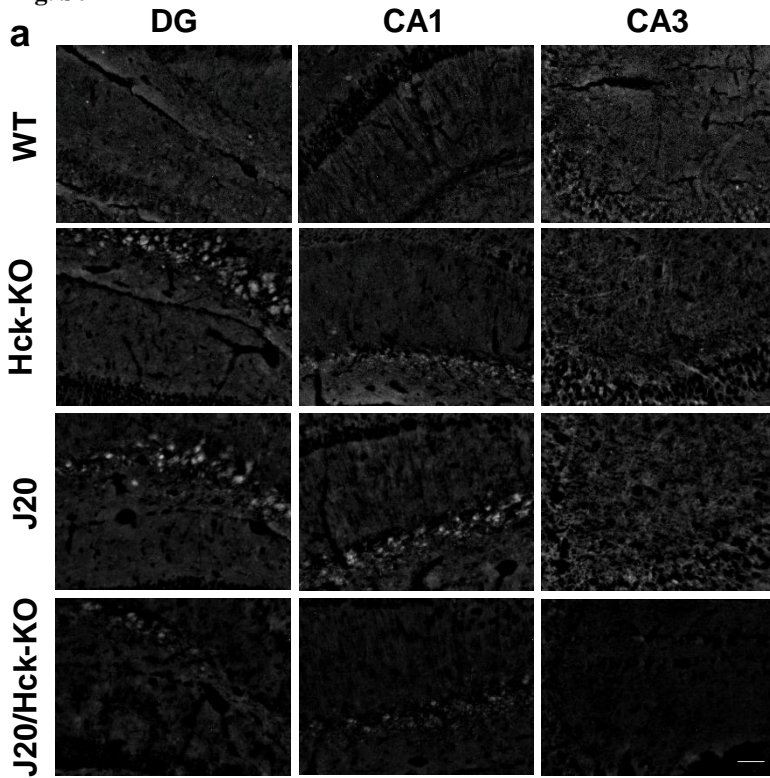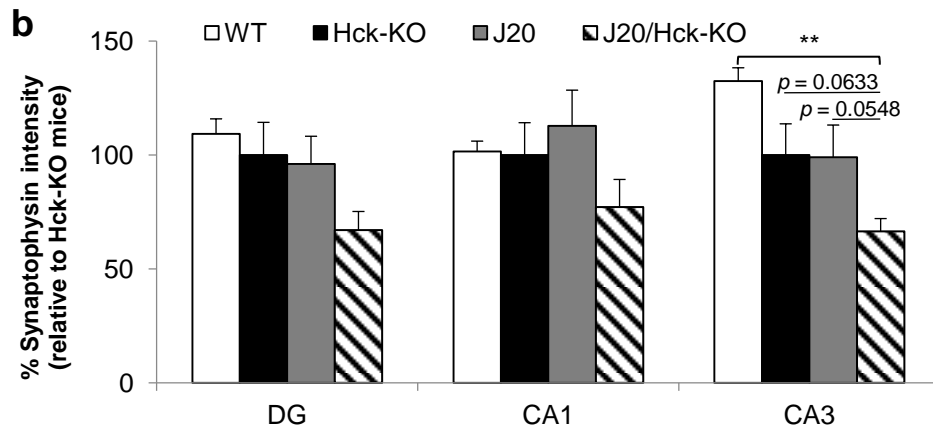

Fig. S7

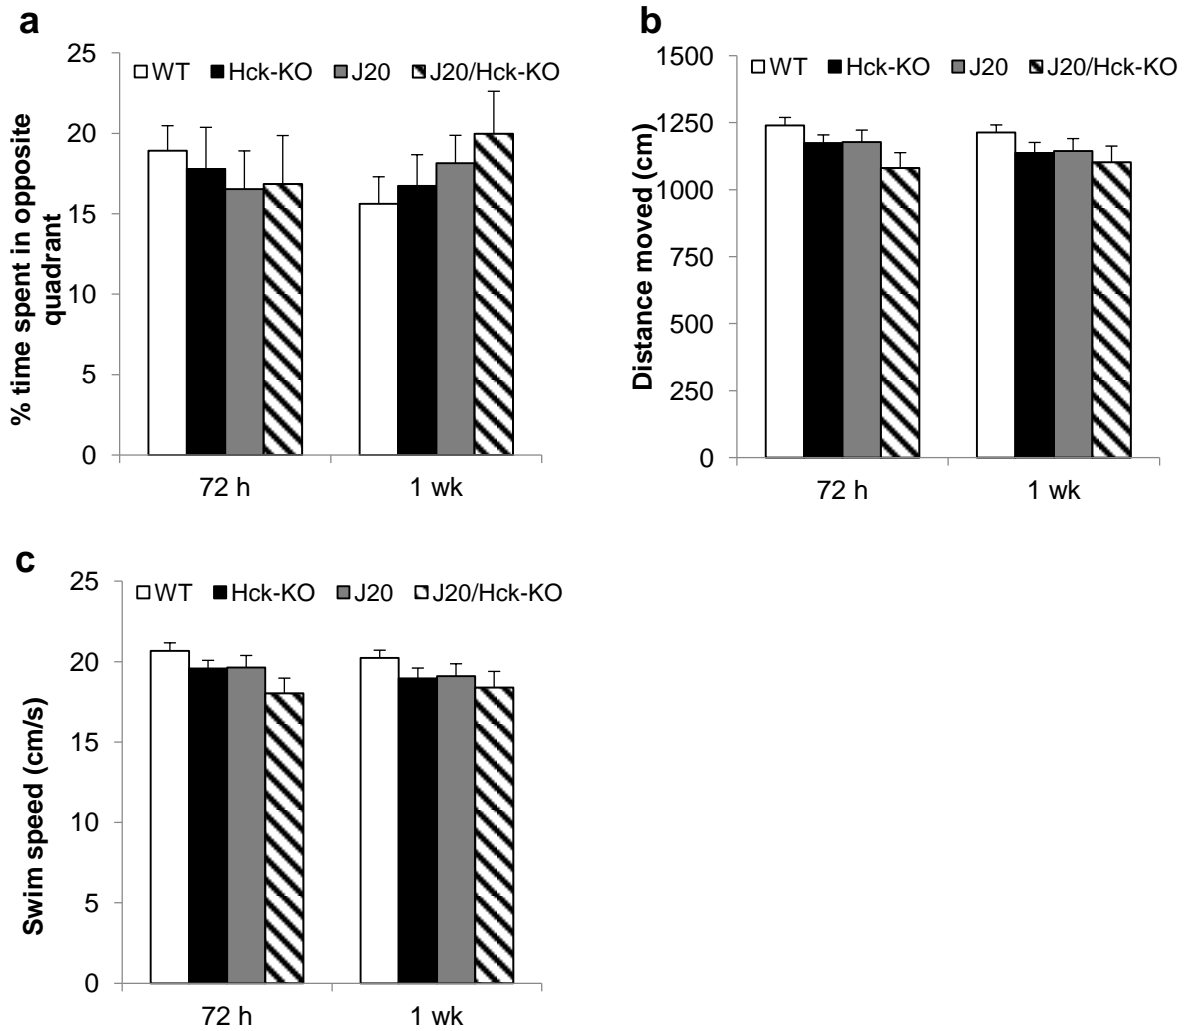

Supplement: NIHMS1040370-supplement-1.pdf [file NIHMS1040370-supplement-1.pdf]
